# Supplementary material for: Life-cycle analysis of greenhouse gas emissions from renewable jet fuel production
Source: PubMed Central journal article supplement (PMC5348797; doi:10.1186/s13068-017-0739-7), 2017-03-14
Supplement: 13068_2017_739_MOESM3_ESM.pdf [file 13068_2017_739_MOESM3_ESM.pdf]

## 2 Sensitivity analysis yield ranges[1]

|                           |                    | Base                    | Pessimistic | Optimistic |
|---------------------------|--------------------|-------------------------|-------------|------------|
|                           |                    | kg fuel product/kg feed |             |            |
| HEFA                      | UCO                | 0.88                    | 0.75        | 0.89       |
|                           | Camelina oil       | 0.88                    | 0.75        | 0.89       |
|                           | Jatropha oil       | 0.88                    | 0.75        | 0.89       |
| FT                        | Poplar             | 0.19                    | 0.13        | 0.22       |
|                           | Willow             | 0.19                    | 0.13        | 0.22       |
|                           | Corn stover        | 0.18                    | 0.13        | 0.22       |
|                           | Forestry residues  | 0.21                    | 0.13        | 0.22       |
| HTL in-situ               | Forestry residues  | 0.27                    | 0.17        | 0.36       |
| HTL ex-situ               | Forestry residues  | 0.27                    | 0.17        | 0.36       |
| Pyrolysis in-situ         | Forestry residues  | 0.24                    | 0.26        | 0.36       |
| Pyrolysis ex-situ         | Forestry residues  | 0.24                    | 0.26        | 0.36       |
| ATJ                       | Ethanol            | 0.54                    | 0.53        | 0.58       |
| DSHC increased blend wall | Sugar <sup>i</sup> | 0.18                    | 0.15        | 0.30       |
| DSHC 10%                  | Sugar <sup>i</sup> | 0.18                    | 0.15        | 0.30       |

i. Sugar to farnasene yield`

### References

1. de Jong S, Hoefnagels R, Faaij A, Slade R, Mawhood R, Junginger M. The feasibility of short-term production strategies for renewable jet fuels – a comprehensive techno-economic comparison. *Biofuel, Bioprod. Bioref.* 2015;9:778–800.
